# Supplementary material for: Strong enhancement of second-harmonic generation (SHG) response through multi-chiral centers and metal-coordination
Source: Royal Society of Chemistry journal article supplement (doi:10.1039/b503039k), 2005-01-01
Supplement: b503039k.pdf [file b503039k.pdf]

Dr. Ren-Gen Xiong  
Coord. Chem. Inst.  
Nanjing Univ. Nanjing, 210093, P. R. China.

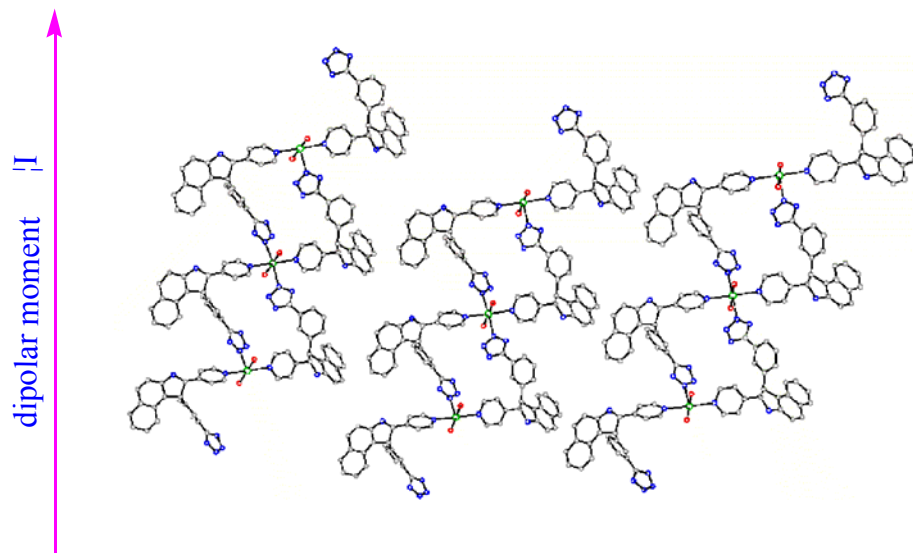

Figure S1 Perspective view of compound **1** aligned in the same direction in its crystal packing.
